# Supplementary material for: Raman Fingerprints of SARS-CoV-2 Omicron Subvariants: Molecular Roots of Virological Characteristics and Evolutionary Directions
Source: PubMed Central journal article supplement — ACS Infect Dis. 2023 Oct 18;9(11):2226–51. doi: 10.1021/acsinfecdis.3c00312 (PMC10644350; doi:10.1021/acsinfecdis.3c00312), 2023-10-18
Supplement: id3c00312_si_001.pdf [file id3c00312_si_001.pdf]

## Supplementary Information

### **Raman fingerprints of SARS-CoV-2 Omicron subvariants: molecular roots of virological characteristics and evolutionary directions**

Giuseppe Pezzotti,<sup>a,b,c,d,e,f,g\*</sup> Eriko Ohgitani,<sup>c</sup> Yuki Fujita,<sup>a</sup> Hayata Imamura,<sup>a,e</sup> Francesco Pappone,<sup>h</sup> Alfio Grillo,<sup>h</sup> Maiko Nakashio,<sup>i</sup> Masaharu Shin-Ya,<sup>c</sup> Tetsuya Adachi,<sup>c,e,j</sup> Toshiro Yamamoto,<sup>e</sup> Narisato Kanamura,<sup>e</sup> Elia Marin,<sup>a,e</sup> Wenliang Zhu,<sup>a</sup> Tohru Inaba,<sup>i</sup> Yoko Tanino,<sup>k</sup> Yoko Nukui,<sup>k</sup> Koichiro Higasa,<sup>l</sup> Yoshiki Yasukochi,<sup>l</sup> Kazu Okuma,<sup>j</sup> and Osam Mazda<sup>c\*</sup>

<sup>a</sup>*Ceramic Physics Laboratory, Kyoto Institute of Technology, Sakyo-ku, Matsugasaki, Kyoto 606-8585, Japan;* <sup>b</sup>*Department of Molecular Genetics, Institute of Biomedical Science, Kansai Medical University, 2-5-1 Shinmachi, Hirakata, Osaka 573-1010, Japan;* <sup>c</sup>*Department of Immunology, Graduate School of Medical Science, Kyoto Prefectural University of Medicine, Kamigyo-ku, 465 Kajii-cho, Kyoto 602-8566, Japan;* <sup>d</sup>*Department of Orthopedic Surgery, Tokyo Medical University, 6-7-1 Nishi-Shinjuku, Shinjuku-ku, 160-0023 Tokyo, Japan;* <sup>e</sup>*Department of Dental Medicine, Graduate School of Medical Science, Kyoto Prefectural University of Medicine, Kamigyo-ku, Kyoto 602-8566, Japan;* <sup>f</sup>*Department of Molecular Science and Nanosystems, Ca' Foscari University of Venice, Via Torino 155, 30172 Venice, Italy;* <sup>g</sup>*Department of Applied Science and Technology, Politecnico di Torino, Corso Duca degli Abruzzi 24, 10129 Torino, Italy;* <sup>h</sup>*Department of Mathematical Science, Politecnico di Torino, Corso Duca degli Abruzzi 24, 10129 Torino, Italy;* <sup>i</sup>*Department of Infection Control & Laboratory Medicine, Kyoto Prefectural University of Medicine, Kamigyo-ku, 465 Kajii-cho, Kyoto 602-8566, Japan;* <sup>j</sup>*Department of Microbiology, Kansai Medical University, School of Medicine, 2-5-1 Shinmachi, Hirakata, 573-1010 Osaka Prefecture, Japan* <sup>k</sup>*Department of Clinical Laboratory, University Hospital, Kyoto Prefectural University of Medicine, Kamigyo-ku, 465 Kajii-cho, Kyoto 602-8566, Japan;* <sup>l</sup>*Genome Analysis, Institute of Biomedical Science, Kansai Medical University, 2-3-1 Shin-machi, Hirakata, Osaka, 573-1191, Japan.*

\*Correspondence: Giuseppe Pezzotti: [pezzotti@kit.ac.jp](mailto:pezzotti@kit.ac.jp);  
Osam Mazda: [mazda@koto.kpu-m.ac.jp](mailto:mazda@koto.kpu-m.ac.jp)

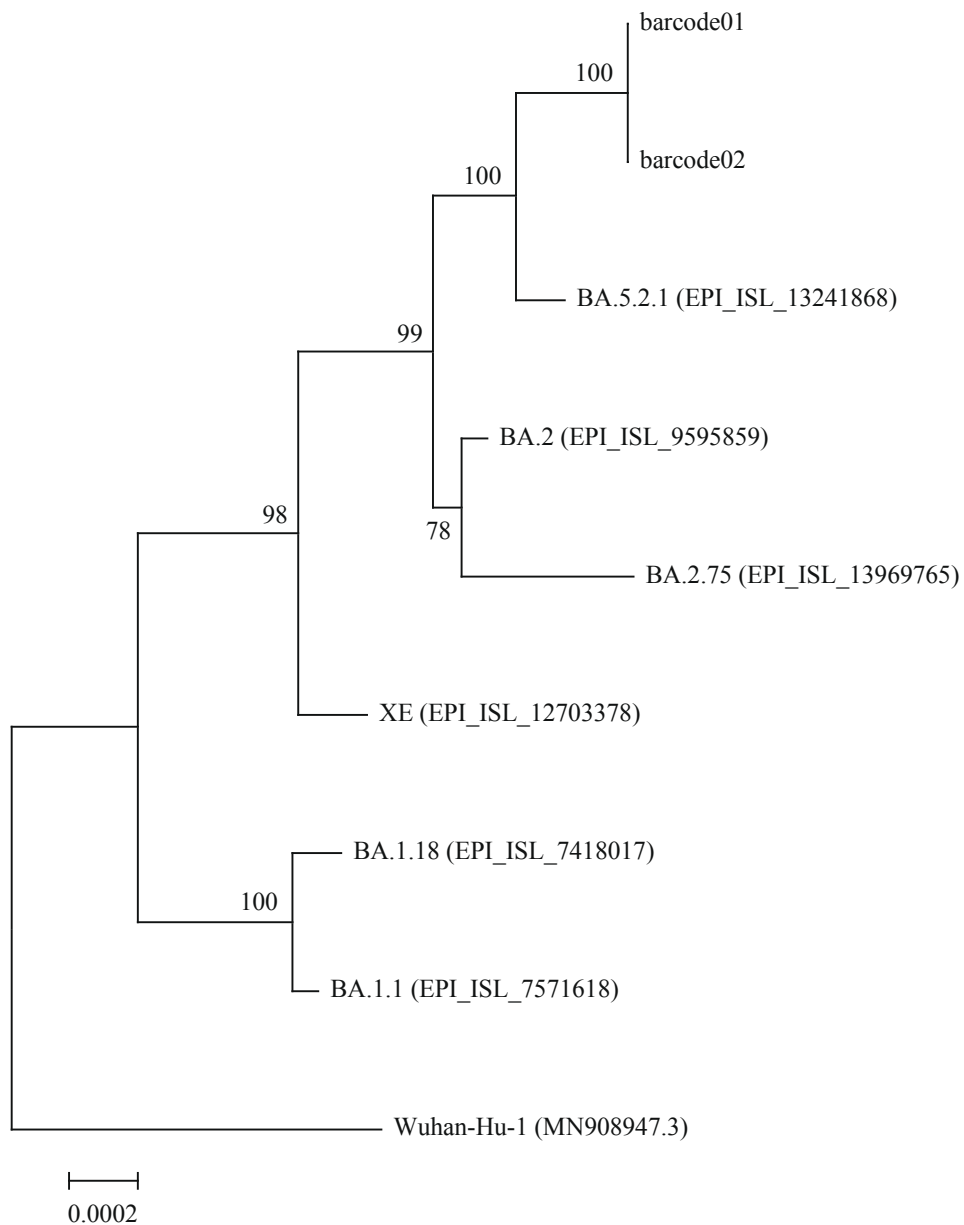

**Figure S1:** The maximum likelihood (ML) tree of SARS-CoV-2 whole genome sequences. Numbers in parentheses are GISAD or GenBank accession numbers. The Hasegawa-Kishino-Yano model with gamma-distributed rate variation across site was used as a distance measure. The internal node number represents bootstrap values (1000 replications). A SARS-CoV-2 reference genome sequence (Wuhan-Hu-1) was used as an outgroup. The ML tree analysis indicating that the genome sequences of the swab samples can be classified into BA.5.2.
